# Supplementary material for: Common Variants in 40 Genes Assessed for Diabetes Incidence and Response to Metformin and Lifestyle Intervention in the Diabetes Prevention Program
Source: PubMed Central journal article supplement — Diabetes. 2010 Aug 3;59(10):2672–81. doi: 10.2337/db10-0543 (PMC3279522; doi:10.2337/db10-0543), 2010-08-03
Supplement: supp_db10-0543_db100543onlineappendix1.pdf [file supp_db10-0543_db100543onlineappendix1.pdf]

## APPENDIX: List of DPP investigators

### (Genetics version)

#### Pennington Biomedical Research Center (Baton Rouge, LA)

George A. Bray, MD\*  
Iris W. Culbert, BSN, RN, CCRC\*\*  
Catherine M. Champagne, PhD, RD  
Barbara Eberhardt, RD, LDN  
Frank Greenway, MD  
Fonda G. Guillory, LPN  
April A. Herbert, RD  
Michael L. Jeffers, LPN  
Betty M. Kennedy, MPA  
Jennifer C. Lovejoy, PhD  
Laura H. Morris, BS  
Lee E. Melancon, BA, BS  
Donna Ryan, MD  
Deborah A. Sanford, LPN  
Kenneth G. Smith, BS, MT  
Lisa L. Smith, BS  
Julia A. St. Amant, RTR  
Richard T. Tulley, PhD  
Paula C. Vicknair, MS, RD  
Donald Williamson, PhD  
Jeffery J. Zachwieja, PhD

#### University of Chicago (Chicago, IL)

Kenneth S. Polonsky, MD\*  
Janet Tobian, MD, PhD\*  
David Ehrmann, MD\*  
Margaret J. Matulik, RN, BSN\*\*  
Bart Clark, MD  
Kirsten Czech, MS  
Catherine DeSandre, BA  
Ruthanne Hilbrich, RD  
Wylie McNabb, EdD  
Ann R. Semenske, MS, RD

#### Jefferson Medical College (Philadelphia, PA)

Jose F. Caro, MD\*  
Pamela G. Watson, RN, ScD\*  
Barry J. Goldstein, MD, PhD\*  
Kellie A. Smith, RN, MSN\*\*  
Jewel Mendoza, RN, BSN\*\*  
Renee Liberoni, MPH  
Constance Pepe, MS, RD  
John Spandorfer, MD

#### University of Miami (Miami, FL)

Richard P. Donahue, PhD\*  
Ronald B. Goldberg, MD\*  
Ronald Prineas, MD, PhD\*

Patricia Rowe, MPA\*\*  
Jeanette Calles, MEd  
Paul Cassanova-Romero, MD  
Hermes J. Florez, MD  
Anna Giannella, RD, MS  
Lascelles Kirby, MS  
Carmen Larreal  
Valerie McLymont, RN  
Jadell Mendez  
Juliet Ojito, RN  
Arlette Perry, PhD  
Patrice Saab, PhD

#### The University of Texas Health Science Center (San Antonio, TX)

Steven M. Haffner, MD, MPH\*  
Maria G. Montez, RN, MSHP, CDE\*\*  
Carlos Lorenzo, MD, PhD  
Arlene Martinez, RN, BSN, CDE

#### University of Colorado (Denver, CO)

Richard F. Hamman, MD, DrPH\*  
Patricia V. Nash, MS\*\*  
Lisa Testaverde, MS\*\*  
Denise R. Anderson, RN, BSN  
Larry B. Ballonoff, MD  
Alexis Bouffard, MA,  
B. Ned Calonge, MD, MPH  
Lynne Delve  
Martha Farago, RN  
James O. Hill, PhD  
Shelley R. Hoyer, BS  
Bonnie T. Jortberg, MS, RD, CDE  
Dione Lenz, RN, BSN  
Marsha Miller, MS, RD  
David W. Price, MD  
Judith G. Regensteiner, PhD  
Helen Seagle, MS, RD  
Carissa M. Smith, BS  
Sheila C. Steinke, MS  
Brent VanDorsten, PhD

#### Joslin Diabetes Center (Boston, MA)

Edward S. Horton, MD\*  
Kathleen E. Lawton, RN\*\*  
Ronald A. Arky, MD  
Marybeth Bryant  
Jacqueline P. Burke, BSN  
Enrique Caballero, MD

Karen M. Callaphan, BA  
Om P. Ganda, MD  
Therese Franklin  
Sharon D. Jackson, MS, RD, CDE  
Alan M. Jacobsen, MD  
Lyn M. Kula, RD  
Margaret Kocal, RN, CDE  
Maureen A. Malloy, BS  
Maryanne Nicosia, MS, RD  
Cathryn F. Oldmixon, RN  
Jocelyn Pan, BS, MPH  
Marizel Quitingon  
Stacy Rubtchinsky, BS  
Ellen W. Seely, MD  
Dana Schweizer, BSN  
Donald Simonson, MD  
Fannie Smith, MD  
Caren G. Solomon, MD, MPH  
James Warram, MD

**VA Puget Sound Health Care System and  
University of Washington (Seattle, WA)**

Steven E. Kahn, MB, ChB\*  
Brenda K. Montgomery, RN, BSN, CDE\*\*  
Wilfred Fujimoto, MD  
Robert H. Knopp, MD  
Edward W. Lipkin, MD  
Michelle Marr, BA  
Dace Trence, MD

**University of Tennessee (Memphis, TN)**

Abbas E. Kitabchi, PhD, MD, FACP\*  
Mary E. Murphy, RN, MS, CDE, MBA\*\*  
William B. Applegate, MD, MPH  
Michael Bryer-Ash, MD  
Sandra L. Frieson, RN  
Raed Imseis, MD  
Helen Lambeth, RN, BSN  
Lynne C. Lichtermann, RN, BSN  
Hooman Oktaei, MD  
Lily M.K. Rutledge, RN, BSN  
Amy R. Sherman, RD, LD  
Clara M. Smith, RD, MHP, LDN  
Judith E. Soberman, MD  
Beverly Williams-Cleaves, MD

**Northwestern University's Feinberg School of  
Medicine (Chicago, IL)**

Boyd E. Metzger, MD\*  
Mariana K. Johnson, MS, RN\*\*  
Catherine Behrends  
Michelle Cook, MS  
Marian Fitzgibbon, PhD  
Mimi M. Giles, MS, RD  
Deloris Heard, MA  
Cheryl K.H. Johnson, MS, RN

Diane Larsen, BS  
Anne Lowe, BS  
Megan Lyman, BS  
David McPherson, MD  
Mark E. Molitch, MD  
Thomas Pitts, MD  
Renee Reinhart, RN, MS  
Susan Roston, RN, RD  
Pamela A. Schinleber, RN, MS

**Massachusetts General Hospital (Boston, MA)**

David M. Nathan, MD\*  
Charles McKittrick, BSN\*\*  
Heather Turgeon, BSN\*\*  
Kathy Abbott  
Ellen Anderson, MS, RD  
Laurie Bissett, MS, RD  
Enrico Cagliero, MD  
Linda Delahanty, MS, RD  
Valerie Goldman, MS, RD  
Alexandra Poulos

**University of California-San Diego (San Diego,  
CA)**

Jerrold M. Olefsky, MD\*  
Mary Lou Carrion-Petersen, RN, BSN\*\*  
Elizabeth Barrett-Connor, MD  
Steven V. Edelman, MD  
Robert R. Henry, MD  
Javiva Horne, RD  
Simona Szerdi Janesch, BA  
Diana Leos, RN, BSN  
Sundar Mudaliar, MD  
William Polonsky, PhD  
Jean Smith, RN  
Karen Vejvoda, RN, BSN, CDE, CCRC

**St. Luke's-Roosevelt Hospital (New York, NY)**

F. Xavier Pi-Sunyer, MD\*  
Jane E. Lee, MS\*\*  
David B. Allison, PhD  
Nancy J. Aronoff, MS, RD  
Jill P. Crandall, MD  
Sandra T. Foo, MD  
Carmen Pal, MD  
Kathy Parkes, RN  
Mary Beth Pena, RN  
Ellen S. Rooney, BA  
Gretchen E.H. Van Wye, MA  
Kristine A. Viscovich, ANP

**Indiana University (Indianapolis, IN)**

David G. Marrero, PhD\*  
Melvin J. Prince, MD\*  
Susie M. Kelly, RN, CDE\*\*  
Yolanda F. Dotson, BS

Edwin S. Fineberg, MD  
John C. Guare, PhD  
Angela M. Hadden  
James M. Ignaut, MA  
Marcia L. Jackson  
Marion S. Kirkman, MD  
Kieren J. Mather, MD  
Beverly D. Porter, MSN  
Paris J. Roach, MD  
Nancy D. Rowland, BS, MS  
Madelyn L. Wheeler, RD

**Medstar Research Institute (Washington, DC)**

Robert E. Ratner, MD\*  
Gretchen Youssef, RD, CDE\*\*  
Sue Shapiro, RN, BSN, CCRC\*\*  
Catherine Bavidio-Arrage, MS, RD, LD  
Geraldine Boggs, MSN, RN  
Marjorie Bronsord, MS, RD, CDE  
Ernestine Brown  
Wayman W. Cheatham, MD  
Susan Cola  
Cindy Evans  
Peggy Gibbs  
Tracy Kellum, MS, RD, CDE  
Claresa Levatan, MD  
Asha K. Nair, BS  
Maureen Passaro, MD  
Gabriel Uwaifo, MD

**University of Southern California/UCLA Research Center (Alhambra, CA)**

Mohammed F. Saad, MD\*  
Maria Budget\*\*  
Sujata Jinagouda, MD\*\*  
Khan Akbar, MD  
Claudia Conzues  
Perpetua Magpuri  
Kathy Ngo  
Amer Rassam, MD  
Debra Waters  
Kathy Xaphthalmous

**Washington University (St. Louis, MO)**

Julio V. Santiago, MD\* (deceased)  
Samuel Dagogo-Jack, MD, MSc, FRCP, FACP\*  
Neil H. White, MD, CDE\*  
Samia Das, MS, MBA, RD, LD\*\*  
Ana Santiago, RD\*\*  
Angela Brown, MD  
Edwin Fisher, PhD  
Emma Hurt, RN  
Tracy Jones, RN  
Michelle Kerr, RD  
Lucy Ryder, RN  
Cormarie Wernimont, MS, RD

**Johns Hopkins School of Medicine (Baltimore, MD)**

Christopher D. Saudek, MD\*  
Vanessa Bradley, BA\*\*  
Emily Sullivan, MEd, RN\*\*  
Tracy Whittington, BS\*\*  
Caroline Abbas  
Frederick L. Brancati, MD, MHS  
Jeanne M. Clark, MD  
Jeanne B. Charleston, RN, MSN  
Janice Freel  
Katherine Horak, RD  
Dawn Jiggetts  
Deloris Johnson  
Hope Joseph  
Kimberly Loman  
Henry Mosley  
Richard R. Rubin, PhD  
Alafia Samuels, MD  
Kerry J. Stewart, EdD  
Paula Williamson

**University of New Mexico (Albuquerque, NM)**

David S. Schade, MD\*  
Karwyn S. Adams, RN, MSN\*\*  
Carolyn Johannes, RN, CDE\*\*  
Leslie F. Adler, PhD  
Patrick J. Boyle, MD  
Mark R. Burge, MD  
Janene L. Canady, RN, CDE  
Lisa Chai, RN  
Ysela Gonzales, RN, MSN  
Doris A. Hernandez-McGinnis  
Patricia Katz, LPN  
Carolyn King  
Amer Rassam, MD  
Sofya Rubinchik, MD  
Willette Senter, RD  
Debra Waters, PhD

**Albert Einstein College of Medicine (Bronx, NY)**

Harry Shamoon, MD\*  
Janet O. Brown, RN, MPH, MSN\*\*  
Elsie Adorno, BS  
Liane Cox, MS, RD  
Jill Crandall, MD  
Helena Duffy, MS, C-ANP  
Samuel Engel, MD  
Allison Friedler, BS  
Crystal J. Howard-Century, MA  
Stacey Kloiber, RN  
Nadege Longchamp, LPN  
Helen Martinez, RN, MSN, FNP-C  
Dorothy Pompei, BA  
Jonathan Scheindlin, MD  
Elissa Violino, RD, MS

Elizabeth Walker, RN, DNSc, CDE  
Judith Wylie-Rosett, EdD, RD  
Elise Zimmerman, RD, MS  
Joel Zonszein, MD

**University of Pittsburgh (Pittsburgh, PA)**

Trevor Orchard, MD\*  
Rena R. Wing, PhD\*  
Gaye Koenning, MS, RD\*\*  
M. Kaye Kramer, BSN, MPH\*\*  
Susan Barr, BS  
Miriam Boraz  
Lisa Clifford, BS  
Rebecca Culyba, BS  
Marlene Frazier  
Ryan Gilligan, BS  
Susan Harrier, MLT  
Louann Harris, RN  
Susan Jeffries, RN, MSN  
Andrea Kriska, PhD  
Qurashia Manjoo, MD  
Monica Mullen, MHP, RD  
Alicia Noel, BS  
Amy Otto, PhD  
Linda Semler, MS, RD  
Cheryl F. Smith, PhD  
Marie Smith, RN, BSN  
Elizabeth Venditti, PhD  
Valarie Weinzierl, BS  
Katherine V. Williams, MD, MPH  
Tara Wilson, BA

**University of Hawaii (Honolulu, HI)**

Richard F. Arakaki, MD\*  
Renee W. Latimer, BSN, MPH\*\*  
Narleen K. Baker-Ladao, BS  
Ralph Beddow, MD  
Lorna Dias, AA  
Jillian Inouye, RN, PhD  
Marjorie K. Mau, MD  
Kathy Mikami, BS, RD  
Pharis Mohideen, MD  
Sharon K. Odom, RD, MPH  
Raynette U. Perry, AA

**Southwest American Indian Centers (Phoenix, AZ;  
Shiprock, NM; Zuni, NM)**

William C. Knowler, MD, DrPH\*  
Norman Coeoyate\*\*  
Mary A. Hoskin, RD, MS\*\*  
Carol A. Percy, RN, MS\*\*  
Kelly J. Acton, MD, MPH  
Vickie L. Andre, RN, FNP  
Rosalyn Barber  
Shandiin Begay, MPH  
Peter H. Bennett, MB, FRCP

Mary Beth Benson, RN, BSN  
Evelyn C. Bird, RD, MPH  
Brenda A. Broussard, RD, MPH, MBA, CDE  
Marcella Chavez, RN, AS  
Tara Dacawyma  
Matthew S. Doughty, MD  
Roberta Duncan, RD  
Cyndy Edgerton, RD  
Jacqueline M. Ghahate  
Justin Glass, MD  
Martia Glass, MD  
Dorothy Gohdes, MD  
Wendy Grant, MD  
Robert L. Hanson, MD, MPH  
Ellie Horse  
Louise E. Ingraham, MS, RD, LN  
Merry Jackson  
Priscilla Jay  
Roylen S. Kaskalla  
David Kessler, MD  
Kathleen M. Kobus, RNC-ANP  
Jonathan Krakoff, MD  
Catherine Manus, LPN  
Sara Michaels, MD  
Tina Morgan  
Yolanda Nashboo (deceased)  
Julie A. Nelson, RD  
Steven Poirier, MD  
Evette Polczynski, MD  
Mike Reidy, MD  
Jeanine Roumain, MD, MPH  
Debra Rowse, MD  
Sandra Sangster  
Janet Sewenemewa  
Darryl Tonemah, PhD  
Charlton Wilson, MD  
Michelle Yazzie

**George Washington University Biostatistics Center  
(DPP Coordinating Center Rockville, MD)**

Raymond Bain, PhD\*  
Sarah Fowler, PhD\*  
Tina Brenneman\*\*  
Solome Abebe  
Julie Bamdad, MS  
Jackie Callaghan  
Sharon L. Edelstein, ScM  
Yuping Gao  
Kristina L. Grimes  
Nisha Grover  
Lori Haffner, MS  
Steve Jones  
Tara L. Jones  
Richard Katz, MD  
John M. Lachin, ScD  
Pamela Mucik

Robert Orlosky  
James Rochon, PhD  
Alla Sapozhnikova  
Hanna Sherif, MS  
Charlotte Stimpson  
Marinella Temprosa, MS  
Fredricka Walker-Murray

**Central Biochemistry Laboratory (Seattle, WA)**

Santica Marcovina, PhD, ScD\*  
Greg Strylewicz, PhD\*\*  
F. Alan Aldrich

**Epidemiological Cardiology Research Center-  
Epicare (Winston-Salem, NC)**

Pentti Rautaharju, MD, PhD\*  
Ronald J. Prineas, MD, PhD\*/\*\*  
Teresa Alexander  
Charles Campbell, MS  
Sharon Hall  
Yabing Li, MD  
Margaret Mills  
Nancy Pemberton, MS  
Farida Rautaharju, PhD  
Zhuming Zhang, MD

**NIH/NIDDK (Bethesda, MD)**

R. Eastman, MD  
Judith Fradkin, MD  
Sanford Garfield, PhD

**Nutrition Coding Center (Columbia, SC)**

Elizabeth Mayer-Davis, PhD\*  
Robert R. Moran, PhD\*\*

**Quality of Well-Being Center (La Jolla, CA)**

Ted Ganiats, MD\*  
Kristin David, MHP\*  
Andrew J. Sarkin, PhD\*

**Genetics Working Group**

Jose C. Florez, MD, PhD<sup>1,2</sup>  
David Altshuler, MD, PhD<sup>1,2</sup>  
Paul I.W. de Bakker, PhD<sup>2</sup>  
Paul Franks, PhD, Mphil, MS<sup>3,6</sup>  
Robert L. Hanson, MD, MPH<sup>3</sup>  
Kathleen Jablonski, PhD<sup>5</sup>  
William C. Knowler, MD, DrPH<sup>3</sup>  
Jarred B. McAteer, AB<sup>1,2</sup>  
Toni I. Pollin, PhD<sup>4</sup>  
Alan R. Shuldiner, MD<sup>4</sup>

<sup>1</sup> Massachusetts General Hospital; <sup>2</sup> Broad Institute; <sup>3</sup> NIDDK; <sup>4</sup> University of Maryland; <sup>5</sup> Coordinating Center; <sup>6</sup> Umea University

\* Principal Investigator; \*\* Program Coordinator

Supplementary Table 1: Extent of common variation captured in 40 candidate genes in populations of European or African descent

| GENE            | Targeted region (NCBI 36) | n tag SNPs | HapMap CEU (European) |                     |                     |                       | HapMap YRI (African) |                     |                     |                       |
|-----------------|---------------------------|------------|-----------------------|---------------------|---------------------|-----------------------|----------------------|---------------------|---------------------|-----------------------|
|                 |                           |            | r <sup>2</sup> ≥0.8   | r <sup>2</sup> ≥0.5 | mean r <sup>2</sup> | lowest r <sup>2</sup> | r <sup>2</sup> ≥0.8  | r <sup>2</sup> ≥0.5 | mean r <sup>2</sup> | lowest r <sup>2</sup> |
| <i>ABCC8</i>    | chr11:17361008-17475025   | 84         | 99%                   | 99%                 | 0.970               | 0.209                 | 92%                  | 98%                 | 0.933               | 0.315                 |
| <i>ADIPOQ</i>   | chr3:188023157-188068946  | 25         | 85%                   | 100%                | 0.928               | 0.502                 | 80%                  | 83%                 | 0.836               | 0.118                 |
| <i>ADIPOR1</i>  | chr1:201166584-201214323  | 22         | 96%                   | 100%                | 0.961               | 0.786                 | 96%                  | 100%                | 0.911               | 0.633                 |
| <i>ADIPOR2</i>  | chr12:1650508-1778106     | 31         | 98%                   | 100%                | 0.967               | 0.658                 | 95%                  | 98%                 | 0.908               | 0.382                 |
| <i>CAPN10</i>   | chr2:241154818-241197193  | 33         | 84%                   | 84%                 | 0.867               | 0.096                 | 92%                  | 92%                 | 0.900               | 0.067                 |
| <i>CREB1</i>    | chr2:208082861-208188527  | 13         | 97%                   | 100%                | 0.981               | 0.738                 | 96%                  | 100%                | 0.963               | 0.666                 |
| <i>CYP3A4</i>   | chr7:99182540-99239744    | 15         | 71%                   | 85%                 | 0.731               | 0.009                 | 84%                  | 87%                 | 0.867               | 0.212                 |
| <i>FOXO1A</i>   | chr13:40017801-40158734   | 35         | 98%                   | 98%                 | 0.964               | 0.210                 | 96%                  | 100%                | 0.947               | 0.626                 |
| <i>GCG</i>      | chr2:162697634-162737003  | 13         | 100%                  | 100%                | 0.960               | 0.839                 | 92%                  | 92%                 | 0.894               | 0.371                 |
| <i>GCK</i>      | chr7:44140395-44215547    | 37         | 98%                   | 98%                 | 0.980               | 0.292                 | 92%                  | 96%                 | 0.948               | 0.348                 |
| <i>HNF1A</i>    | chr12:119880932-119934695 | 20         | 100%                  | 100%                | 0.976               | 0.832                 | 87%                  | 91%                 | 0.854               | 0.174                 |
| <i>HNF1B</i>    | chr17:33110547-33199209   | 74         | 94%                   | 97%                 | 0.938               | 0.335                 | 92%                  | 95%                 | 0.930               | 0.177                 |
| <i>HNF4A</i>    | chr20:42397855-42501725   | 66         | 94%                   | 97%                 | 0.954               | 0.228                 | 85%                  | 92%                 | 0.890               | 0.123                 |
| <i>ITLN1</i>    | chr1:159102954-159141584  | 11         | 100%                  | 100%                | 0.977               | 0.826                 | 84%                  | 97%                 | 0.800               | 0.255                 |
| <i>ITLN2</i>    | chr1:159171440-159211213  | 15         | 83%                   | 87%                 | 0.871               | 0.368                 | 76%                  | 86%                 | 0.812               | 0.018                 |
| <i>KCNJ11</i>   | chr11:17353374-17387454   | 9          | 94%                   | 100%                | 0.952               | 0.686                 | 74%                  | 92%                 | 0.879               | 0.239                 |
| <i>MC4R</i>     | chr18:56179544-56210981   | 21         | 100%                  | 100%                | 0.937               | 0.803                 | 89%                  | 93%                 | 0.847               | 0.089                 |
| <i>MEF2A</i>    | chr15:97903656-98084150   | 38         | 96%                   | 98%                 | 0.934               | 0.143                 | 92%                  | 95%                 | 0.889               | 0.356                 |
| <i>MEF2D</i>    | chr1:154690143-154757153  | 16         | 95%                   | 95%                 | 0.899               | 0.060                 | 97%                  | 97%                 | 0.921               | 0.321                 |
| <i>NEUROD1</i>  | chr2:182239439-182273626  | 14         | 100%                  | 100%                | 0.979               | 0.877                 | 92%                  | 100%                | 0.936               | 0.682                 |
| <i>PCK1</i>     | chr20:55549543-55584919   | 37         | 96%                   | 97%                 | 0.935               | 0.373                 | 95%                  | 98%                 | 0.948               | 0.158                 |
| <i>PCK2</i>     | chr14:23613323-23653179   | 14         | 92%                   | 92%                 | 0.921               | 0.402                 | 83%                  | 88%                 | 0.868               | 0.071                 |
| <i>PDX1</i>     | chr13:27372168-27408451   | 13         | 100%                  | 100%                | 0.991               | 0.941                 | 88%                  | 88%                 | 0.891               | 0.206                 |
| <i>PKLR</i>     | chr1:153515708-153557849  | 10         | 100%                  | 100%                | 0.994               | 0.960                 | 93%                  | 93%                 | 0.916               | 0.229                 |
| <i>PPARA</i>    | chr22:44905163-45028317   | 63         | 91%                   | 94%                 | 0.922               | 0.034                 | 89%                  | 95%                 | 0.910               | 0.085                 |
| <i>PPARG</i>    | chr3:12284349-12460855    | 59         | 97%                   | 98%                 | 0.966               | 0.182                 | 91%                  | 99%                 | 0.894               | 0.370                 |
| <i>PPARGC1A</i> | chr4:23392742-23520798    | 79         | 98%                   | 100%                | 0.965               | 0.603                 | 98%                  | 99%                 | 0.946               | 0.459                 |
| <i>PPARGC1B</i> | chr5:149070057-149217462  | 96         | 98%                   | 100%                | 0.962               | 0.571                 | 88%                  | 98%                 | 0.905               | 0.127                 |
| <i>PRKAA1</i>   | chr5:40785238-40854054    | 9          | 84%                   | 84%                 | 0.848               | 0.251                 | 100%                 | 100%                | 0.954               | 0.804                 |
| <i>PRKAA2</i>   | chr1:56863578-56963596    | 18         | 91%                   | 93%                 | 0.909               | 0.099                 | 95%                  | 98%                 | 0.870               | 0.103                 |
| <i>PRKAB1</i>   | chr12:118570144-118613812 | 10         | 95%                   | 95%                 | 0.938               | 0.053                 | 92%                  | 96%                 | 0.902               | 0.018                 |

|                |                          |    |      |      |       |       |      |      |       |       |
|----------------|--------------------------|----|------|------|-------|-------|------|------|-------|-------|
| <i>PRKAB2</i>  | chr1:145083309-145130753 | 13 | 70%  | 83%  | 0.828 | 0.259 | 93%  | 96%  | 0.884 | 0.491 |
| <i>PRKAG1</i>  | chr12:47672322-47718859  | 7  | 100% | 100% | 0.991 | 0.897 | 57%  | 100% | 0.799 | 0.534 |
| <i>PRKAG2*</i> | chr7:150874134-151021682 | 53 | 94%  | 99%  | 0.956 | 0.171 | 95%  | 98%  | 0.921 | 0.268 |
| <i>PRKAG3</i>  | chr2:219385350-219424756 | 11 | 85%  | 85%  | 0.880 | 0.161 | 100% | 100% | 0.980 | 0.867 |
| <i>PTPN1</i>   | chr20:48540298-48644493  | 27 | 98%  | 100% | 0.972 | 0.748 | 100% | 100% | 0.940 | 0.802 |
| <i>SLC22A1</i> | chr6:160442853-160509740 | 47 | 96%  | 100% | 0.982 | 0.528 | 88%  | 97%  | 0.894 | 0.143 |
| <i>SLC22A2</i> | chr6:160547782-160619949 | 44 | 98%  | 98%  | 0.969 | 0.307 | 92%  | 94%  | 0.907 | 0.243 |
| <i>SLC47A1</i> | chr17:19357759-19432938  | 29 | 94%  | 94%  | 0.946 | 0.133 | 81%  | 86%  | 0.858 | 0.159 |
| <i>STK11</i>   | chr19:1136798-1189434    | 10 | 72%  | 72%  | 0.788 | 0.121 | 69%  | 76%  | 0.750 | 0.048 |

*Tagger* was used to select tag SNPs designed to capture all common (minor allele frequency >5%) variants at  $r^2 \geq 0.8$  in 40 candidate genes (plus 20 kb upstream and 10 kb downstream) for both HapMap CEU and YRI populations. Actual coverage obtained by working SNPs is shown for  $r^2 \geq 0.8$  and  $r^2 \geq 0.5$ . (\*) Because of weak linkage disequilibrium (LD) across a substantial segment in the *PRKAG2* gene region, only a subset marked by strong LD was targeted.

Supplementary Table 2: Full association dataset

[Excel spreadsheet]

Supplementary Table 3: SNPs imputed in DPP non-Hispanic white participants

[Excel spreadsheet]
